# Supplementary material for: Changing plasma cytokine, chemokine and growth factor profiles upon differing malaria transmission intensities
Source: PubMed Central journal article supplement (PMC6896751; doi:10.1186/s12936-019-3038-x), 2019-12-05

VEGF &amp; AMA-1 2010

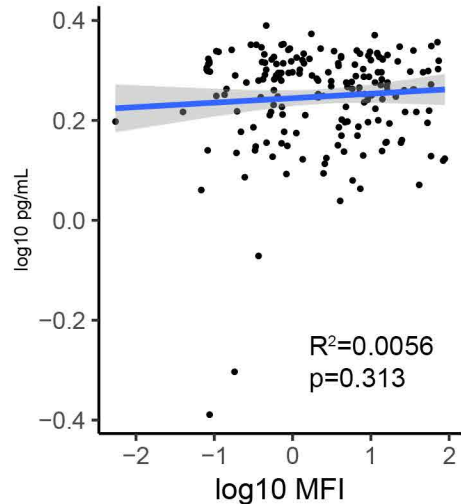

VEGF &amp; AMA-1 2013

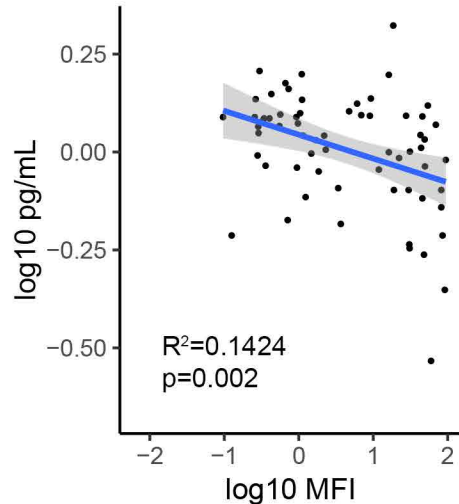IFN- $\alpha$  & AMA-1 2010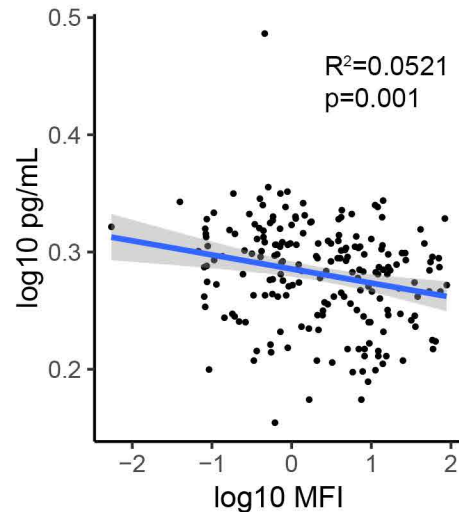IFN- $\alpha$  & AMA-1 2013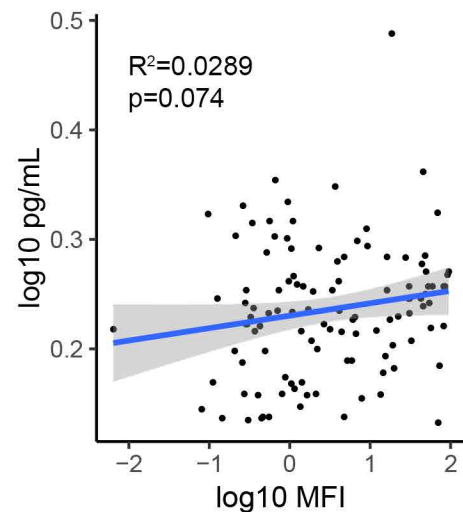

MCP-1 &amp; MSP-1 2010

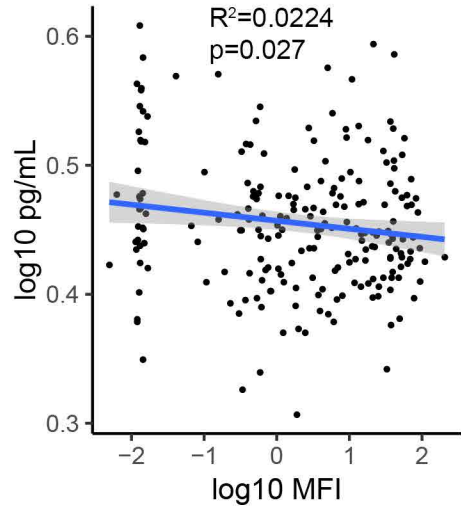

MCP-1 &amp; MSP-1 2013

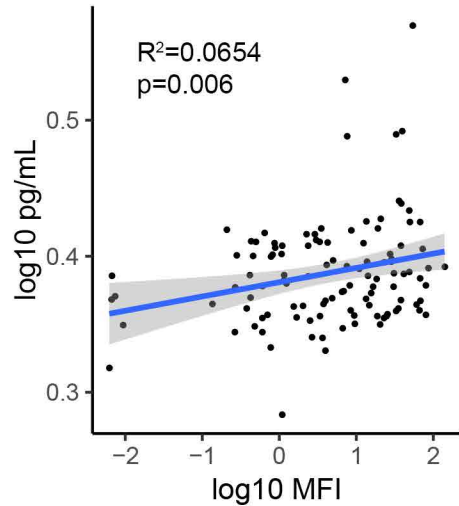IFN- $\alpha$  & MSP-1 2010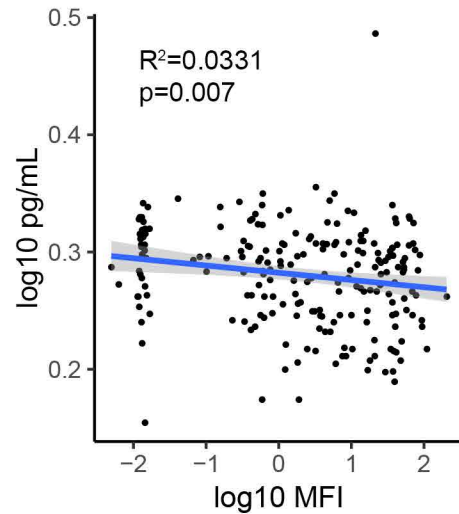IFN- $\alpha$  & MSP-1 2013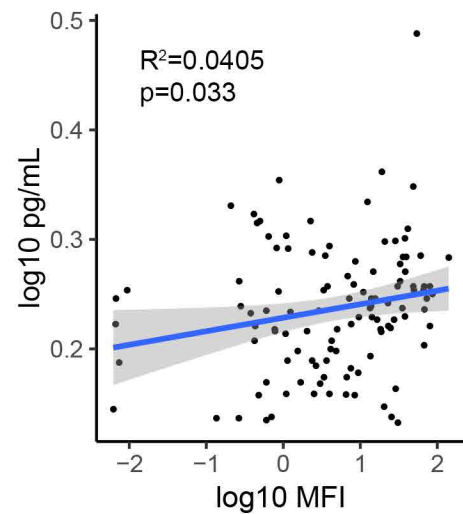

Supplement: 12936_2019_3038_MOESM4_ESM.pdf [file 12936_2019_3038_MOESM4_ESM.pdf]
